# Supplementary material for: Black Elderberry Press Cake as a Source of Bioactive Ingredients Using Green-Based Extraction Approaches
Source: MDPI journal article supplement (doi:10.3390/biology11101465), 2022-10-06
Supplement: s1 [file s1]

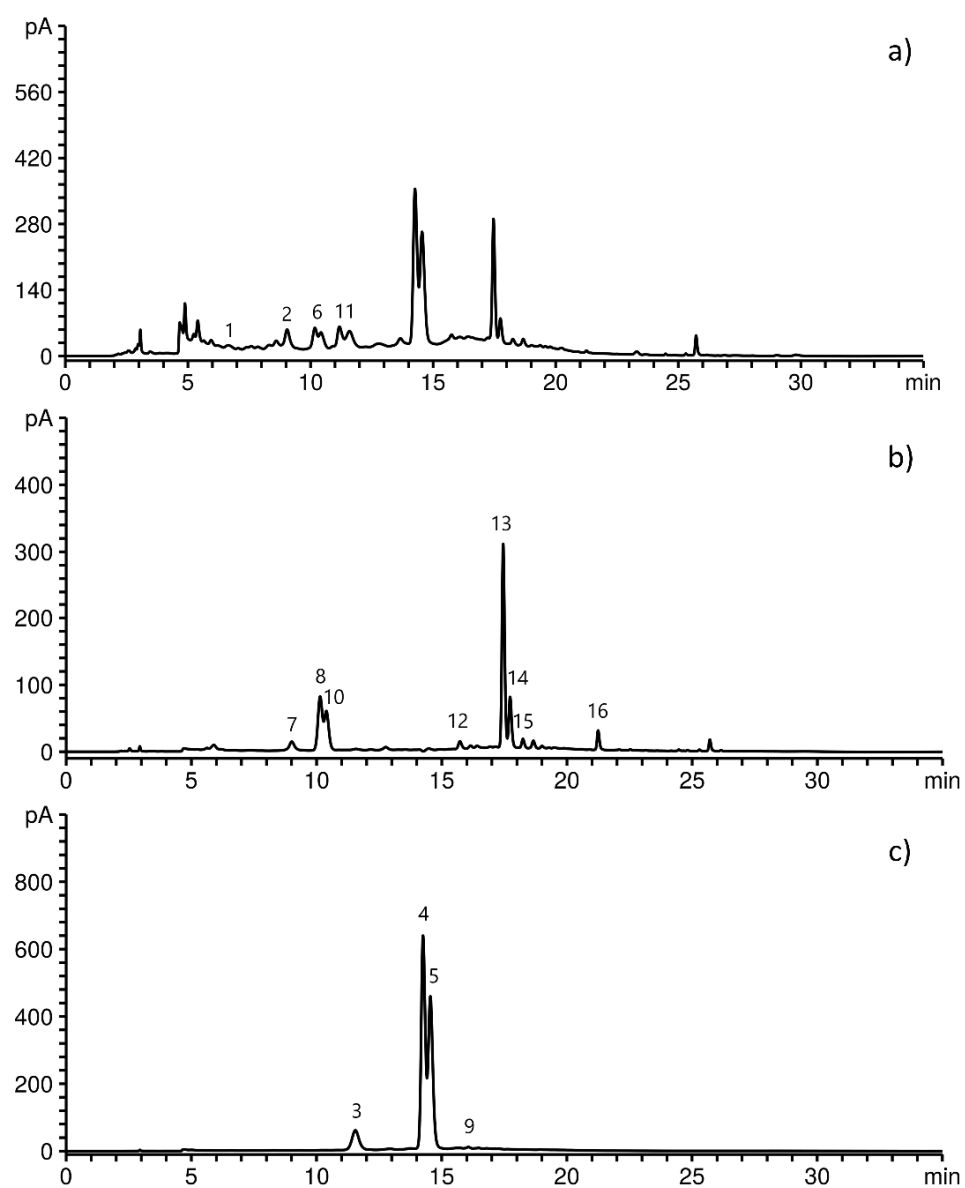

**Figure S1.** HPLC profile of black elderberry press cake SLE extract recorded at a) 290 nm, b) 350 nm and c) 520 nm.

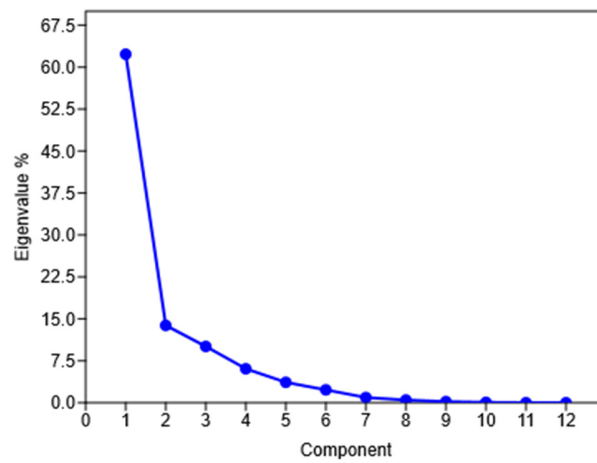

**Figure S2.** PCA scree plot.

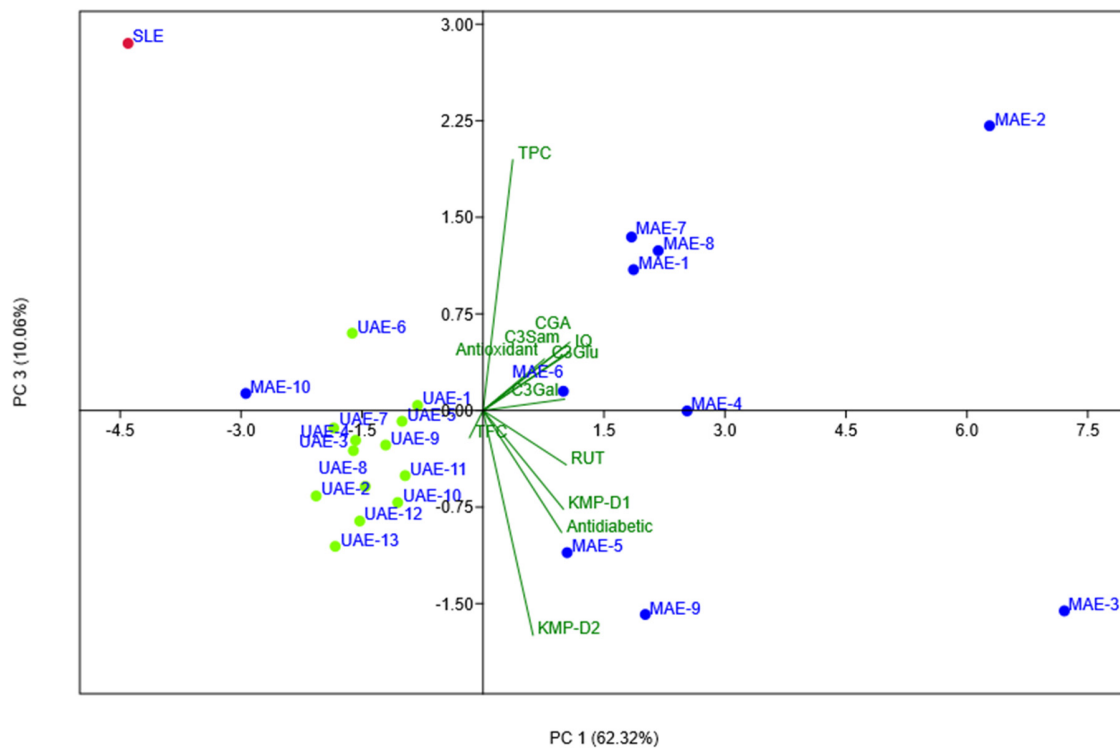

**Figure S3.** PC1 *vs* PC3 bi-plot of obtained black elderberry press cake extracts represented as scores and investigated characteristics as loadings (SLE – red; MAE – blue; UAE – green).

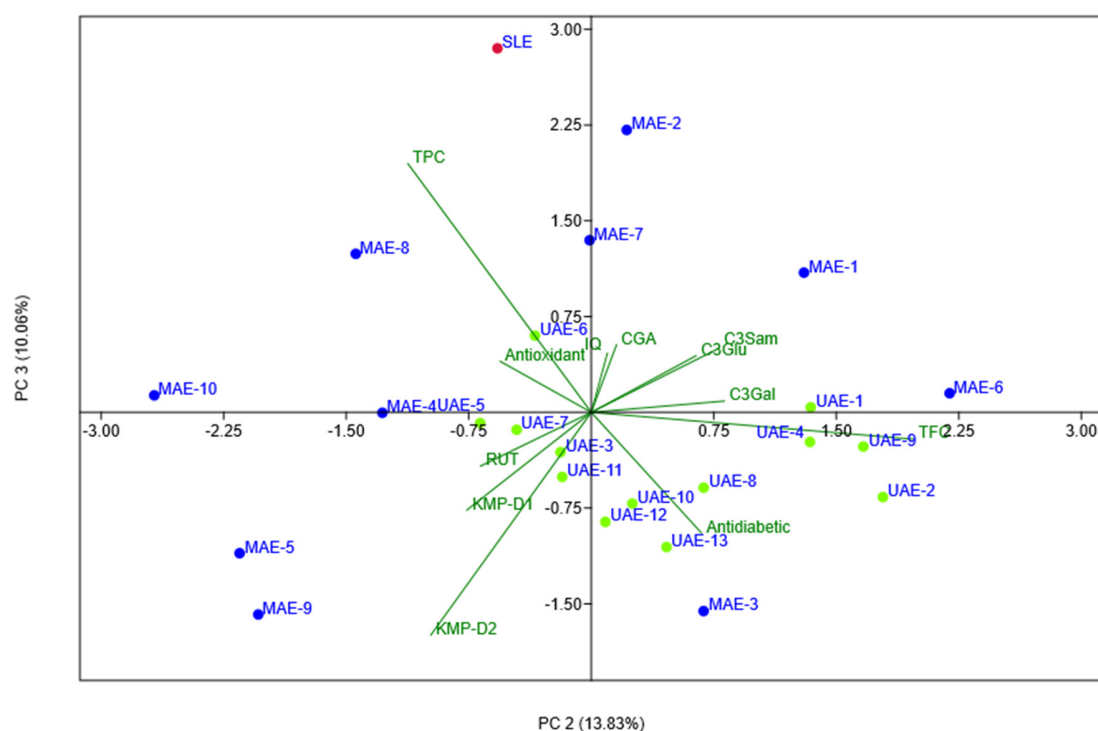

**Figure S4.** PC2 *vs* PC3 bi-plot of obtained black elderberry press cake extracts represented as scores and investigated characteristics as loadings (SLE – red; MAE – blue; UAE – green).

**Table S1.** Pearson's correlation coefficients.

|        | TPC    | TFC    | AO    | AD    | C3Gal | C3Sam | C3Glu | RUT   | IQ    | KMP-D1 | KMP-D2 | CGA |
|--------|--------|--------|-------|-------|-------|-------|-------|-------|-------|--------|--------|-----|
| TPC    |        |        |       |       |       |       |       |       |       |        |        |     |
| TFC    | -0.319 |        |       |       |       |       |       |       |       |        |        |     |
| AO     | 0.368  | -0.131 |       |       |       |       |       |       |       |        |        |     |
| AD     | -0.026 | 0.122  | 0.421 |       |       |       |       |       |       |        |        |     |
| C3Gal  | 0.153  | 0.043  | 0.424 | 0.851 |       |       |       |       |       |        |        |     |
| C3Sam  | 0.249  | 0.051  | 0.521 | 0.800 | 0.965 |       |       |       |       |        |        |     |
| C3Glu  | 0.264  | -0.004 | 0.533 | 0.808 | 0.963 | 0.995 |       |       |       |        |        |     |
| RUT    | 0.297  | -0.375 | 0.553 | 0.728 | 0.701 | 0.695 | 0.748 |       |       |        |        |     |
| IQ     | 0.364  | -0.104 | 0.667 | 0.762 | 0.817 | 0.875 | 0.890 | 0.843 |       |        |        |     |
| KMP-D1 | 0.255  | -0.353 | 0.542 | 0.736 | 0.664 | 0.632 | 0.688 | 0.977 | 0.782 |        |        |     |
| KMP-D2 | 0.074  | -0.219 | 0.464 | 0.576 | 0.315 | 0.251 | 0.284 | 0.631 | 0.378 | 0.736  |        |     |
| CGA    | 0.361  | -0.085 | 0.662 | 0.755 | 0.808 | 0.876 | 0.89  | 0.829 | 0.996 | 0.761  | 0.343  |     |
